# Seed banks alter metacommunity diversity: the interactive effects of competition, germination, and survival

April 26, 2021

Nathan I. Wisnoski  
email: [nathan.wisnoski@uwyo.edu](mailto:nathan.wisnoski@uwyo.edu)  
Wyoming Geographic Information Science Center  
University of Wyoming, Laramie, WY, 82071, USA

Lauren G. Shoemaker  
email: [lshoema1@uwyo.edu](mailto:lshoema1@uwyo.edu)  
Botany Department  
University of Wyoming, Laramie, WY, 82071, USA

*Data accessibility statement:* Upon acceptance, all data will be archived on Dryad and the data DOI will be included at the end of the article. Model code is available on GitHub, with the URL included in the manuscript.

*Running Title:* Seed banks in metacommunities

*Keywords:* dormancy, metacommunity, dispersal, seed bank, competition

*Type of Article:* Letters

*Number of Words:* Abstract: 150, Main text: 4993, Text Box: 731

*Number of References:* 80, *Number of Figures:* 4, *Number of Tables:* 0, *Number of Text Boxes:* 1

*Statement of authorship:* NIW and LGS conceived the study, developed the approach, and wrote the paper. NIW wrote the first draft of the manuscript, implemented the model and analysis, and made the figures.

## 1 **Abstract**

2 Dispersal and dormancy are two common strategies allowing for species persistence and  
3 the maintenance of ecological diversity in variable environments. However, theory and  
4 empirical tests of spatial diversity patterns tend to examine either mechanism in isolation.  
5 Here, we developed a stochastic, spatially explicit metacommunity model incorporat-  
6 ing seed banks with varying germination and survival rates. We found that dormancy  
7 and dispersal had interactive, nonlinear effects on the maintenance and distribution of  
8 metacommunity diversity, where scale-dependent effects of seed banks were modified  
9 by local competitive interactions and dispersal. The interplay between seed germination  
10 and survival regulated the benefits of seed banks for diversity. Our study shows that the  
11 role of seed banks depends critically on spatial processes, and that classic predictions for  
12 how dispersal affects metacommunity diversity can be strongly influenced by dormancy.  
13 Together, these results highlight the need to consider both temporal and spatial storage  
14 when predicting multi-scale patterns of diversity.

## 15 Introduction

16 Classic community theory posits that ecological communities are shaped by the inter-  
17 play of density-independent processes, intraspecific density dependence, and interspe-  
18 cific interactions (Andrewartha & Birch, 1954; Mittelbach, 2012; Vellend, 2016). Density-  
19 independent factors, such as environmental fluctuations, influence the sizes and relative  
20 abundances of species in the community independently of population density. In contrast,  
21 the effects of density-dependent processes vary with population size (both positively or  
22 negatively). Density dependence can influence per capita growth rates via intraspecific  
23 interactions (e.g., crowding, Allee effects, etc.) or interspecific interactions (e.g., com-  
24 petition, predation, mutualism) that generate non-independence among species in their  
25 population dynamics. The maintenance of biodiversity and species coexistence arises  
26 from the interplay of these processes (Tilman, 1982; Chase & Leibold, 2003). For example,  
27 coexistence occurs if niche differences among species (i.e. differences in their optimal  
28 local abiotic environments) are large enough to overcome differences in fitness (i.e. dif-  
29 ferences in competitive abilities) (Chesson, 2000b; Adler *et al.*, 2007). Local environmental  
30 fluctuations may further promote coexistence, for example via the temporal storage effect  
31 (Chesson, 2000b).

32 Missing from this historical framework is the role of regional community dynamics in  
33 structuring local dynamics (Ricklefs & Schluter, 1993; Cornell & Lawton, 1992; Loreau &  
34 Mouquet, 1999; Harrison & Cornell, 2008). The rise and development of metacommunity  
35 theory have substantially addressed this interplay between local and regional dynamics,  
36 thereby formalizing our understanding of the multi-scale processes that structure com-  
37 munities by incorporating spatial heterogeneity and dispersal between local communities  
38 (Leibold *et al.*, 2004; Holyoak *et al.*, 2005; Logue *et al.*, 2011; Leibold & Chase, 2018). In  
39 particular, metacommunity dynamics are regulated by density-independent responses to

40 abiotic conditions across the landscape, density-dependent biotic interactions, and disper-  
41 sal (Thompson *et al.*, 2020). The relative importance of local- and regional-scale processes  
42 for structuring ecological communities is primarily regulated by rates of dispersal. For  
43 example, dispersal limitation may promote regional diversity if strong competitors are  
44 unable to colonize all available habitat and competitively displace species from locally  
45 structured communities (Leibold & Chase, 2018). Higher rates of dispersal can facilitate  
46 coexistence by enabling species to track changing environmental conditions, but exces-  
47 sively high dispersal can homogenize local communities and lead to the loss of regional-  
48 scale diversity in the absence of local stabilizing interactions (Mouquet & Loreau, 2003;  
49 Thompson *et al.*, 2020). Thus, in addition to coexistence mechanisms that operate at the  
50 local scale, dispersal across landscapes can help maintain diversity at larger scales through  
51 spatial coexistence mechanisms that arise from heterogeneity in both the abiotic and biotic  
52 local environments (Chesson, 2000a; Amarasekare, 2003; Shoemaker & Melbourne, 2016).

53 However, metacommunity theory tends to emphasize how spatial processes affect di-  
54 versity, minimizing the role of temporal life-history strategies for coexistence. As such, our  
55 understanding of species coexistence in temporally variable environments has expanded  
56 in parallel alongside metacommunity theory over the last few decades (Abrams, 1984;  
57 Chesson & Case, 1986; Chesson, 1994, 2000b; Levine & Rees, 2004; Adler *et al.*, 2006; Ches-  
58 son, 2018). As a temporal analogue of dispersal, dormancy is a key mechanism that can  
59 promote species coexistence in temporally variable environments. Dormant individuals  
60 can accumulate into a “seed bank” within a community, buffering species’ population sizes  
61 through time against harsh environmental conditions (Cohen, 1966; Venable & Lawlor,  
62 1980; Brown & Venable, 1986). Transitions into and out of the seed bank can influence  
63 local community dynamics and may promote species coexistence via the temporal storage  
64 effect if species respond differently to environmental fluctuations and have a mechanism  
65 for buffering against poor environmental conditions (Warner & Chesson, 1985; Pake &

66 Venable, 1996; Angert *et al.*, 2009; Gremer & Venable, 2014).

67 Although spatial and temporal processes interactively shape community dynamics,  
68 the joint effects of dormancy and dispersal have rarely been combined, and rather the-  
69 ories for diversity maintenance tend to focus on a single process (Leibold & Norberg,  
70 2004; Holt *et al.*, 2005; Wisnoski *et al.*, 2019; Holyoak *et al.*, 2020). The implications of dor-  
71 mancy for metacommunities extend beyond the local scale and can have regional effects  
72 through interactions with dispersal (Cohen & Levin, 1987; Venable & Brown, 1988; Buoro  
73 & Carlson, 2014; Wisnoski *et al.*, 2019). Understanding the interactions between dispersal  
74 and dormancy in a multi-species context has important implications in applied settings,  
75 such as restoration ecology or invasive species management (Box 1). Empirical evidence  
76 that dormancy may play an important role in metacommunity dynamics is accumulating  
77 from plant (Plue & Cousins, 2018), zooplankton (Brendonck *et al.*, 2017), and microbial  
78 (Wisnoski *et al.*, 2020) communities in nature. For example, the dormant resting stages  
79 of zooplankton that inhabit ephemeral rock pools allow them to contend with extreme  
80 hydrological variability and regulate community dynamics during inundation and drying  
81 phases (Brendonck *et al.*, 2017). During wet periods, propagule buoyancy can regulate  
82 inter-pool dispersal along hydrological vectors (e.g., flooding that connects nearby pools),  
83 while during dry periods, exposed egg banks of dormant propagules can be dispersed  
84 among pools by wind (Vanschoenwinkel *et al.*, 2008). Despite these recent advances,  
85 a comprehensive investigation into how dormant seed banks influence metacommunity  
86 diversity remains lacking.

87 Here, we develop a mathematical model to explore the implications of dormant seed  
88 banks for metacommunity diversity. In particular, we extend metacommunity theory to  
89 examine how and when dormancy helps maintain diversity at local and regional spatial  
90 scales. First, we separate dormancy into the processes of seed/propagule germination  
91 and seed bank survival to explore whether germination or survival has greater effects on

92 diversity across spatial scales. Second, we examine how dispersal modifies the relative  
93 importance of seed germination and survival for the maintenance of diversity. Third, we  
94 evaluate how the strength of local competition, and thereby stable versus unstable local  
95 coexistence, modifies the effects of dormancy on metacommunity diversity. To evaluate  
96 these questions, we develop a spatially-explicit metacommunity model that extends the  
97 recent framework of Thompson *et al.* (2020) to include a classic model of seed bank  
98 dynamics (Cohen, 1966; Levine & Rees, 2004; Levine & HilleRisLambers, 2009). Our  
99 model demonstrates that seed bank dynamics can play an especially important role for  
100 the maintenance of regional diversity and modifies classic predictions for the scaling of  
101 diversity (e.g., Leibold & Chase, 2018; Thompson *et al.*, 2020), depending critically on seed  
102 bank survival, germination, and the strength of local coexistence.

## 103 **Materials and methods**

### 104 **Metacommunity model with a seed bank**

105 To address our research questions, we use a discrete time, spatially explicit model of species  
106 abundances in a metacommunity with local seed banks (Fig. 1). The total population size  
107 of species  $i$  in patch  $x$  at time  $t + 1$  is given by

$$N_{ix}(t + 1) = \overbrace{S_{ix}(t)}^{\text{Survival}} + \overbrace{P_{ix}(t)}^{\text{Seed production}} + \overbrace{E_{ix}(t)}^{\text{Emigration}} - \overbrace{I_{ix}(t)}^{\text{Immigration}}, \quad (1)$$

108 where seed production,  $P_{ix}(t)$ , is regulated by both density-independent abiotic con-  
109 straints and density-dependent biotic interactions that determine realized growth,  $R_{ix}(t)$ ,  
110 and depend on the germinated fraction of the population,  $G_{ix}(t)$ . Seed production in a

111 given year and patch are generally modeled as:

$$P_{ix}(t) = \overbrace{G_{ix}(t)}^{\text{Germination}} \times \overbrace{R_{ix}(t)}^{\text{Aboveground growth}} \quad (2)$$

112 Furthermore, seeds that undergo delayed germination survive in the seed bank,  $S_{ix}(t)$ ; and  
113 the seeds generated by the aboveground community exhibit spatially explicit emigration,  
114  $E_{ix}(t)$ , and immigration,  $I_{ix}(t)$ .

### 115 **Local seed bank dynamics**

116 At the local scale, we model a community with a seed bank by separating the total seed  
117 population into a germinating fraction,  $G_{ix}(t)$ , and a non-germinating fraction,  $N_{ix}(t) -$   
118  $G_{ix}(t)$  (Levine & HilleRisLambers, 2009). To reflect the stochastic nature of germination  
119 and survival in natural systems, we model these processes as arising from a binomial  
120 distribution. The aboveground, germinating fraction of the community is described as

$$G_{ix}(t) \sim \text{Binomial}(n = N_{ix}(t), p = g) \quad (3)$$

121 where  $N_{ix}(t)$  is the population size of species  $i$  in patch  $x$  at time  $t$ , and  $g$  is the probability  
122 of germination for each individual. The non-germinating fraction,  $N_{ix}(t) - G_{ix}(t)$ , then  
123 survives with probability  $s$  in the seed bank and is modeled as

$$S_{ix}(t) \sim \text{Binomial}(n = N_{ix}(t) - G_{ix}(t), p = s). \quad (4)$$

### 124 **Aboveground growth**

125 We determine realized aboveground growth ( $R_{ix}(t)$ , i.e. per capita production of new  
126 seeds) for species  $i$  in patch  $x$ , taking into account density-dependent and density-

127 independent limits on population growth of the germinated fraction of the population.  
 128 We use the classic Beverton-Holt model (Beverton & Holt, 1957) due to its parallel use in  
 129 both spatial and temporal community ecology theory (Levine & HilleRisLambers, 2009;  
 130 Shoemaker & Melbourne, 2016; Hallett *et al.*, 2019; Thompson *et al.*, 2020):

$$R_{ix}(t) = \frac{\overbrace{r_{ix}(t)}^{\text{Density-independent growth}}}{1 + \underbrace{\sum_{j=1}^S \alpha_{ij} G_{jx}(t)}_{\text{Density-dependent effects}}}, \quad (5)$$

131 where  $\alpha_{ij}$  is the competition coefficient describing the density-dependent effects of the  
 132 abundance of species  $j$  on the growth of species  $i$ . Note that this summation includes the  
 133 density-dependent effects of both interspecific ( $i \neq j$ ) and intraspecific ( $i = j$ ) competi-  
 134 tion. We further incorporate density-independent abiotic conditions that affect population  
 135 growth,  $r_{ix}$ , through a Gaussian function describing species  $i$ 's niche optimum ( $z_i$ ) and  
 136 niche breath ( $\sigma_i$ ) in relation to the environmental conditions in patch  $x$

$$r_{ix}(t) = r_{i,\max} \exp\left(-\frac{(z_i - \text{env}_x(t))^2}{2\sigma_i^2}\right), \quad (6)$$

137 such that species  $i$ 's maximum growth rate ( $r_{i,\max}$ ) in patch  $x$  is reduced to  $r_{ix}$ .

138 To incorporate demographic stochasticity in births to the above equation, we model  
 139 population size using a Poisson distribution (Poisson ( $\max\{G_{ix}(t)R_{ix}(t), 0\}$ )), providing  
 140 integer values for each population or zero if the change in population size leads to local  
 141 extinction. We incorporate stochasticity throughout our model due to its importance on  
 142 both population and community dynamics, especially for small population sizes (Lande,  
 143 1993; Shoemaker *et al.*, 2020).



## 144 **Dispersal**

145 We model the number of emigrants leaving patch  $x$ ,  $E_{ix}(t)$ , with a binomial distribution

$$E_{ix}(t) \sim \text{Binomial}(n = G_{ix}(t), p = d), \quad (7)$$

146 where  $d$  is the probability of dispersal. Note that dispersal occurs from the germinated  
147 portion of the community,  $G_{ix}(t)$ . The emigrating fraction of species  $i$  in a metacommunity  
148 with  $M$  patches is given by  $\sum_{x=1}^M E_{ix}(t)$ . From this pool of emigrants, immigration success  
149 in each patch is proportionally determined following a negative exponential dispersal  
150 kernel with geographic distance between patches

$$I_{ix}(t) = E_{ix}(t) \frac{\sum_{y \neq x}^M E_{iy}(t) L_i^{\delta_x}}{\sum_{x=1}^M E_{ix}(t)}, \quad (8)$$

151 where  $L_i$  determines the steepness at which dispersal success decays with geographic  
152 distance ( $\delta_x$ ) between patches  $x$  and  $y$ .

## 153 **Simulations**

154 To investigate (1) the relative importance of germination versus survival on diversity  
155 dynamics, (2) how dispersal regulates the effects of germination versus survival, and (3)  
156 how the strength of local coexistence and local competition modifies metacommunity  
157 dynamics with a seed bank, we ran 30,000 total simulations of our metacommunity model  
158 across a wide range of parameter space, as described below.

### 159 **Abiotic conditions**

160 To ensure our results are not contingent upon a given landscape and environmental struc-  
161 ture, for each metacommunity simulation, we generated a different landscape structure

162 (i.e., patch connectivity) and environmental conditions. Each metacommunity consisted  
163 of 100 patches randomly distributed across a  $100 \times 100$  spatial grid, drawn from a uniform  
164 distribution. Spatio-temporal environmental variation was generated anew for each simu-  
165 lation with the “`env_generate()`” function in the R code provided by Thompson *et al.* (2020)  
166 to accompany the revised metacommunity framework that our work extends. To briefly  
167 overview, for each patch in the metacommunity, stochastic environmental variables were  
168 generated with the RandomFields R package using the “`RMexp()`” function, and only  
169 scenarios with sufficient spatial heterogeneity (i.e., initial environmental differences in  
170 the environmental variable greater than 0.6) were kept for simulating metacommunity  
171 dynamics. This step ensured that temporal environmental trajectories were spatially  
172 autocorrelated, yet sufficiently spatially decoupled across the landscape to support meta-  
173 community dynamics.

#### 174 **Density-independent abiotic response**

175 To incorporate density-independent responses of different species to environmental con-  
176 ditions, species were assigned niche optima ( $z_i$ ) evenly distributed in the range  $[0,1]$ , with  
177 equal niche breadth ( $\sigma_i = 0.5$ ) among species. Species growth rates under the given  
178 environmental conditions in each patch were decreased following the Gaussian function  
179 defined above (Eq. 6), such that greater mismatches between species traits and environ-  
180 mental conditions resulted in lower density-independent growth rates.

#### 181 **Density-dependence and local coexistence**

182 Density-dependence was incorporated via intra- ( $\alpha_{ii}$ ) and interspecific ( $\alpha_{ij}$ ) competition  
183 coefficients in the Beverton-Holt growth component of the model (Eq. 5). Intraspecific  
184 competition was always set to  $\alpha_{ii} = 1$ . We explored two different scenarios to evaluate the  
185 implications of locally stable coexistence and competition dynamics versus dispersal and

186 dormancy for diversity dynamics. In *equal intra- and inter-specific competition* ( $\alpha_{ii} = \alpha_{ij}$ ),  
187 species coexistence arises from differential responses to abiotic conditions along with  
188 dispersal and/or dormancy, as the lack of differences in intra- versus interspecific compe-  
189 tition cannot promote coexistence. Alternatively, for *stable competition* ( $\alpha_{ii} > \alpha_{ij}$ ), species  
190 can coexist locally in communities due to competitive differences; these processes oper-  
191 ate in unison with spatial and temporal coexistence mechanisms arising from dispersal  
192 and dormancy. To generate the species interaction matrices, values in the off-diagonal  
193 ( $\alpha_{ij}$ ) were set to 1 for the “equal intra- and interspecific competition” scenario, and were  
194 drawn from a uniform distribution in the range  $[0, 1]$  for the “stable competition” scenario.  
195 The interaction matrix was rescaled by a factor of 0.05 to allow larger population sizes  
196 (Thompson *et al.*, 2020).

## 197 **Dispersal and dormancy**

198 We simulated our above metacommunity model across a range of parameter values to  
199 examine the effect of seed bank germination and survival rates on diversity dynamics. We  
200 simulated 10 germination rates, evenly spaced from 10% germination to full germination  
201 (i.e., no seed bank) per year (i.e.  $g = [0.1, \dots, 1]$ ). We also simulated across a range of  
202 three survival rates in the seed bank, spanning low ( $s = 0.1$ ), intermediate ( $s = 0.5$ ), and  
203 perfect ( $s = 1$ ) survival per year. Last, we simulated across 50 dispersal rates, evenly  
204 distributed in logarithmic space ( $d = [10^{-5}, \dots, 1]$ ), ranging from extremely low dispersal  
205 (i.e., no metacommunity connectivity; dynamics depend on local processes only) to a  
206 well-mixed system with no dispersal limitation between patches (i.e., every individual  
207 leaves the patch every year when  $d = 1$ ).

208 We ran 15,000 simulations each for equal and stabilizing competition coefficients,  
209 yielding 10 replicate simulations for each combination of dispersal, germination, and  
210 survival rates. We generated a new landscape configuration and new species interaction

211 matrix for each of the 10 replicate simulations.

## 212 **Analysis**

213 To quantify changes in aboveground biodiversity across spatial scales, we calculated local  
214 ( $\alpha$ ), among-patch ( $\beta$ ), and metacommunity ( $\gamma$ ) diversity for each simulation  
215 following a multiplicative partitioning framework:

$$\gamma = \text{mean}(\alpha) \times \beta \quad (9)$$

216 Differences in  $\alpha$ -,  $\beta$ -, and  $\gamma$ -diversity from replicate simulations with the  
217 same parameter values illustrate expected variation for a given combination of set disper-  
218 sal, seed bank survival, and germination rates when considering the combined effects of  
219 demographic and environmental stochasticity, landscape configuration, and variation in  
220 competition interactions. To assess the overall relationship between dispersal and diver-  
221 sity at different scales, we used local regression (Cleveland, 1979). We visualized trends  
222 with locally weighted scatterplot smoothing (LOWESS) computed across all simulations  
223 for each parameter set using the ggplot2 R package (Wickham, 2016). Code to reproduce  
224 the analysis is available at <https://github.com/nwisnoski/metacom-coexistence>.

## 225 **Results**

### 226 **Diversity under equal intra- and inter-specific competition**

227 To understand how seed bank dynamics can modify patterns of diversity in the absence of  
228 local coexistence mechanisms, we first analyzed a scenario where intra- and interspecific  
229 competition were equal. The rate of germination in the seed bank dramatically altered  
230 the classic relationship between dispersal rates and  $\alpha$ -,  $\beta$ -, and  $\gamma$ -diversity in

231 metacommunities. With high seed survival, reduced germination shifted the traditional  
232 hump-shaped relationship between mean alpha-diversity and dispersal rate, such that  
233 dormancy had little effect on alpha-diversity at low dispersal rates ( $< 10^{-3}$ ), but led to  
234 strong increases in alpha-diversity with higher dispersal rates (Fig. 2). For example, at  
235 high dispersal rates, when the probability of germination was 0.10, local communities had  
236 roughly 4 times higher diversity than scenarios without a seed bank.

237 In contrast, reduced germination had a slightly negative effect on beta-diversity when  
238 dispersal rates were low (e.g., dispersal  $< 1 \times 10^{-4}$ , Fig. 2). Due to the negative ef-  
239 fects on beta-diversity at low dispersal rates and the positive effects on alpha-diversity  
240 at intermediate-to-high dispersal rates, persistent seed banks had opposing effects on  
241 gamma-diversity at high versus low dispersal rates (Fig. 2). When incorporating seed  
242 bank dynamics, as dispersal increases, gamma-diversity no longer declined towards dom-  
243 inance of the metacommunity by a single regionally superior competitor. Instead, seed  
244 banks maintained nearly 10 times higher gamma diversity at high dispersal rates. How-  
245 ever, at low rates of dispersal ( $< 10^{-4}$ ), reduced germination decreased gamma-diversity  
246 relative to scenarios without a seed bank. In this simplified scenario, we focused on large  
247 differences in germination rates (0.1 vs. 1), but a fine-grained investigation of germination  
248 rate revealed the gradual transitions between these two endpoints ( $s = 1$ ; right column,  
249 Fig. 3). Thus far, we assumed full seed bank survival ( $s = 1$ ) to demonstrate the poten-  
250 tial effects that reduced germination could have on metacommunity diversity. However,  
251 survival rate is likely to be less than perfect.

252 Relaxing our previous assumption and allowing for imperfect survival ( $s < 1$ ), reduced  
253 germination was less successful at promoting diversity across the dispersal gradient in  
254 the absence of stabilizing competition. Specifically, reduced survival in the seed bank  
255 increased the dispersal and/or germination rates necessary for maintaining metacommunity  
256 diversity (left and middle columns, Fig. 3). At the lowest germination rates, imperfect

257 seed bank survival also introduced a minimum dispersal threshold ( $d \approx 10^{-3}$ ) necessary  
258 for any species to persist; this was most noticeable when germination was less than 0.4 (Fig.  
259 S1). Consequently, the highest mean alpha-diversity was detected when dispersal was  
260 intermediate and germination was sufficiently high to compensate for the lower survival  
261 rates in the seed bank. When germination was higher than the minimum threshold for  
262 species persistence, yet lower than complete germination, seed banks maintained higher  
263 beta- and gamma-diversity at low dispersal rates. However, because the lowest germina-  
264 tion rates were still too low to compensate for the losses associated with reduced survival  
265 (darker lines, left and middle columns, Fig. 3), intermediate germination rates maintained  
266 regional diversity through positive effects on beta-diversity across much of the dispersal  
267 gradient ( $d < 10^{-2}$ ). Thus, in metacommunities with low seed bank survival and low  
268 germination rates, higher dispersal rates were necessary to allow some populations to  
269 persist. However, the lowest germination strategies were no longer as beneficial for the  
270 maintenance of diversity, regardless of scale, as they were when seed bank survival was  
271 perfect.

## 272 **Stabilizing competition coefficients**

273 In natural communities, many species may exhibit niche differences that lead to stabilizing  
274 competitive interactions, such as trade-offs in resource requirements. These stabilizing  
275 mechanisms can promote species coexistence at local scales, even in the absence of spa-  
276 tial or temporal mechanisms. As such, we extended our analysis above to examine the  
277 interplay of dormant seed banks and dispersal on biodiversity with locally stable coexis-  
278 tence via intra- and interspecific competitive differences. When locally stable competitive  
279 interactions were included, the effects of germination and seed bank survival strongly  
280 differed from patterns without local coexistence mechanisms (Figs. 4, S2). In addition,  
281 stabilizing competition yielded differing effects of reduced germination when seed bank

282 survival was high versus low.

283 In the simplifying case where seed bank survival was perfect ( $s = 1$ , right column of Fig.  
284 4), mean alpha-diversity was an increasing function of dispersal. This positive dispersal-  
285 diversity relationship arose because all species could potentially coexist locally due to  
286 stronger intraspecific than interspecific competition. Thus, increasing dispersal allowed  
287 species to reach all patches where positive growth was possible given abiotic conditions.  
288 Interestingly, across all dispersal rates, germination had minimal effects on mean alpha-  
289 diversity, except at the lowest germination rates (Fig. 4, S2). When coexistence was locally  
290 stable and dispersal was limiting, intermediate germination rates maintained the highest  
291 beta-diversity. In contrast, low germination maintained beta-diversity at intermediate  
292 dispersal rates. The consequences of reduced germination for diversity maintenance were  
293 strongest at the regional scale (Fig. 4, bottom-right panel). In particular, low germination  
294 maintained higher gamma-diversity in the metacommunity across the entire dispersal  
295 gradient, but the increase in diversity relative to conditions lacking a seed bank were  
296 largest at low-to-intermediate dispersal rates.

297 When seed bank survival was intermediate or low, we observed qualitatively different  
298 effects of seed banks on metacommunity diversity (left and middle columns, Fig. 4). With  
299 low-to-intermediate seed bank survival, reduced germination had consistently negative  
300 effects on mean alpha-diversity across the entire dispersal gradient. The lower the ger-  
301 mination rate, the higher the rate of dispersal necessary to maintain diversity at a given  
302 survival rate (Fig. S2). In contrast to scenarios with perfect seed bank survival or equal  
303 local competition, seed banks had strikingly large positive effects on beta-diversity at low-  
304 to-intermediate dispersal and germination rates. Similar to results in the absence of stable  
305 coexistence, imperfect survival in the seed bank introduced a minimum threshold for dis-  
306 persal and germination rates necessary for diversity to persist. When germination rates  
307 were above the minimum for persistence, gamma-diversity was less variable across the re-

308 maining germination rates. But when dispersal was higher, reduced germination tended  
309 to have negative effects on gamma-diversity not through any effects on beta-diversity, but  
310 instead by limiting the germination of coexisting species at the local scale when survival  
311 was low.

## 312 **Discussion**

313 Our results highlight how dormant seed banks affect classic patterns of diversity in meta-  
314 communities via interactions among germination, survival, and dispersal. The joint effects  
315 of dormancy and dispersal on diversity also depend strongly on whether intra- and in-  
316 terspecific competition are equal or stabilizing (i.e.,  $\text{intra} > \text{inter}$ ). In the case of equal  
317 competition, survival and germination alter the classic dispersal-diversity relationship in  
318 several ways (Fig. 3). Lower germination rates increase alpha- and gamma-diversity at  
319 higher dispersal rates, but only if survival in the seed bank is sufficiently high; otherwise,  
320 reduced germination lowers aboveground alpha- and gamma-diversity. With decreasing  
321 seed survival and dispersal, intermediate germination is important for maintaining re-  
322 gional diversity largely through the preservation of beta-diversity at low dispersal rates.  
323 With stabilizing local coexistence (Fig. 4), seed bank survival is again an important regu-  
324 lator of the scale-dependent effects of germination on diversity. When seed bank survival  
325 is imperfect, any reduction in germination reduces alpha diversity, but intermediate levels  
326 of germination preserve beta-diversity if dispersal is not too strong. Yet when seed bank  
327 survival is high, reductions in germination increase alpha- and beta-diversity, thereby  
328 maintaining higher regional diversity across all dispersal rates. Thus, the nonlinear, scale-  
329 dependent effects of dormancy on metacommunity diversity depend on local competitive  
330 interactions, as previously highlighted in metacommunity and coexistence literature, but  
331 are also strongly dependent on the balance between germination and survival in the seed



332 bank, and the rate of dispersal in the landscape.

### 333 **The relationship between seed banks and diversity depends on both** 334 **local and spatial processes**

335 Much theoretical and empirical research has demonstrated the benefits of seed banks  
336 for local diversity maintenance under temporally varying environments (Chesson, 2000b;  
337 Saatkamp *et al.*, 2014). However, our work indicates that local processes alone may pro-  
338 vide an incomplete picture of how seed bank dynamics influence aboveground diversity.  
339 In particular, we show that in addition to local scale processes (such as seed bank sur-  
340 vival, germination, and the strength of local coexistence), dispersal plays a critical role in  
341 regulating the ability of seed banks to maintain locally diverse communities.

342 Notably, reduced germination and high dispersal can interact to promote alpha-  
343 diversity when local stabilizing factors are weak and seed bank survival is high. Previous  
344 models lacking dormancy have shown that high rates of dispersal in the absence of local  
345 coexistence can reduce diversity by homogenizing the spatial structure of the metacom-  
346 munity. In other words, high dispersal causes a metacommunity to operate as a single  
347 patch favoring superior competitors (Mouquet & Loreau, 2003). Our results indicate that  
348 temporal mechanisms associated with seed banks can counteract diversity losses under  
349 high rates of dispersal, specifically when competition is equal and seed bank survival is  
350 high (Fig. 3). High seed bank survival provides more opportunities for successful germi-  
351 nation. The lower the germination rate, the more slowly the stockpile of dormant diversity  
352 in the seed bank is depleted (Thompson & Grime, 1979; Thompson, 1987). Consistent with  
353 the storage effect, any losses due to poorly timed germination (e.g., during unfavorable  
354 environments) are minimized at lower germination rates, but recruitment benefits gained  
355 from individuals germinating during favorable environmental conditions replenish the

356 population in the seed bank. Low germination may also reduce aboveground competition  
357 and the number of dispersers, further buffering against dispersal-induced diversity loss.

358 When competitive interactions are stabilizing and seed survival is high, a reduction in  
359 germination increases diversity across a broader range of dispersal rates (Fig. 4). Because  
360 stabilizing coexistence allows local populations to re-establish from low abundances, even  
361 low germination rates are sufficient to promote population persistence following above-  
362 ground extinctions. The benefits of reduced germination for local aboveground diversity  
363 are consistent across dispersal rates because, even at extremely low dispersal rates where  
364 most communities are independent of one another, the seed bank can maintain a stably  
365 coexisting community of species favored by the local environment. Hence, at low disper-  
366 sal rates, higher mean alpha diversity occurred when species could stably coexist (Fig. 4)  
367 than when inter- and intraspecific interactions were equal (Fig. 3).

### 368 **Local coexistence modifies the dispersal-dependent effects of seed banks** 369 **on regional diversity**

370 The germination strategies that maximize regional diversity in the metacommunity de-  
371 pend critically on dispersal and the strength of local coexistence. With high survival and  
372 no stabilizing competitive interactions, low germination rates can inhibit gamma-diversity  
373 when dispersal is limiting and increase gamma-diversity at intermediate-to-high dispersal  
374 rates (Fig. 3). In plant communities, for example, dispersal is frequently limiting across  
375 a range of ecosystems, even more so in disturbed ecosystems (Myers & Harms, 2009). In  
376 metacommunities with local disturbances, previous models suggest that seed banks main-  
377 tain gamma-diversity at low dispersal rates by preserving both alpha- and beta-diversity  
378 (Wisnoski *et al.*, 2019). When communities are isolated, our results suggest higher ger-  
379 mination rates may be required for some species to persist in local communities, and

380 contribute to beta-diversity, in the face of stochastic population dynamics. Thus, interme-  
381 diate germination strategies maintain the highest regional diversity at low dispersal rates,  
382 but once dispersal is high enough to facilitate environmental tracking across space and  
383 time, further reductions in germination maintain significantly higher gamma-diversity.

384 In contrast, when seeds have high survival rates and competitive interactions are  
385 stabilizing, low germination rates promote regional diversity across all dispersal rates  
386 (Fig. 4). In this scenario, intermediate germination rates still preserve the highest beta-  
387 diversity when dispersal is low. However, because the benefits of reduced germination  
388 for alpha-diversity are independent of dispersal, gamma-diversity consistently benefits  
389 from the lowest germination rates. Thus, in the case of stabilizing coexistence, at low  
390 dispersal rates ( $< 10^{-4}$ ), seed banks contribute to the maintenance of gamma-diversity  
391 primarily through their ability to maintain higher mean alpha-diversity in dispersal-  
392 limited communities (Fig. 4). However, above this same dispersal rate, both alpha- and  
393 beta-diversity were highest when germination is lowest. For example, in fragmented  
394 grassland communities across Sweden, the loss of spatial connectivity led to a decline  
395 in species reliant on dispersal and impeded the ability of dormancy to maintain some  
396 species, but species with long-lived seeds persisted via local seed bank dynamics (Plue  
397 & Cousins, 2018). Therefore, the joint benefits of reduced germination for maintaining  
398 locally diverse but regionally different communities combine to maintain much higher  
399 gamma-diversity across a wide range of intermediate-to-high dispersal values.

## 400 **Intermediate germination rates promote diversity under imperfect seed** 401 **bank survival**

402 When seed bank survival was high, the lowest germination rates often maintained the  
403 highest local and regional diversity because remaining in the seed bank was not risky.

404 However, in natural systems, individuals are gradually lost from seed banks due to burial  
405 (Bonis & Lepart, 1994; Brendonck & De Meester, 2003), damage (Long *et al.*, 2015), and  
406 consumption (Janzen, 1971; Horst & Venable, 2018). When seed bank survival is less  
407 than perfect, our model highlights how germination rates must be high enough so that  
408 individuals germinate before being lost from the seed bank. Otherwise, the seed bank  
409 becomes a reproductive sink for aboveground populations. For example, a stochastic  
410 population model for the invasive musk thistle *Carduus nutans*, which forms abundant  
411 and persistent seed banks with survival surpassing 20 years, showed that the evolutionary  
412 stable strategy for germination probability increased with the probability of seed death  
413 (Rees *et al.*, 2006). That is, germination should be higher when seed survival is low because  
414 of the fitness costs associated with losses in the seed bank.

415 When remaining in the seed bank is risky (i.e., survival = 0.1, 0.5), our model suggests  
416 reduced germination decreases alpha-diversity. Natural populations may have insufficient  
417 germination rates for many reasons, including recent environmental changes or physio-  
418 logical limitations that prevent optimal germination strategies (Wisnoski *et al.*, 2019). For  
419 example, in a long-term study of forb communities at the Cedar Creek Natural History  
420 Area, experimental nitrogen fertilization caused a compositional divergence between the  
421 seed bank and the aboveground community; this discrepancy was hypothesized to arise  
422 from germination inhibition (Kitajima & Tilman, 1996). The benefits of intermediate  
423 germination for diversity emerged at the regional scale. Previous models suggest that  
424 dormancy may be able to substitute for dispersal under certain conditions (Venable &  
425 Brown, 1988; Cohen & Levin, 1991; Snyder, 2006), such as when dispersal is limiting  
426 and local environments vary through time (Wisnoski *et al.*, 2019). Our results emphasize  
427 the importance of “temporal dispersal” that maintains beta-diversity when dispersal is  
428 low-to-intermediate ( $< 10^{-2}$ ). In contrast, when dispersal is high, low germination and  
429 seed survival promote losses from the seed bank, which may explain why, in some cases,

430 gamma-diversity is lower with a seed bank than without one. This loss of regional diver-  
431 sity occurs from the negative interaction of both spatial homogenization and “temporal  
432 dispersal” limitation. In the extreme case, with low survival, low germination, and low  
433 dispersal, the metacommunity cannot persist.

## 434 **Future Directions**

435 Our aim in this study was to develop an understanding of how variation in seed bank  
436 dynamics through germination and survival interact with local scale processes (e.g., com-  
437 petition) and regional processes (e.g., dispersal) to affect patterns of diversity. Histori-  
438 cally, our understanding of how dormant seed banks can influence patterns of diversity  
439 in ecological communities have primarily been informed by local scale studies. Like-  
440 wise, metacommunity research has largely overlooked the potential role of seed banks  
441 in influencing the structure and dynamics of local communities as well as the potential  
442 interactions that emerge between dispersal and dormancy that can affect regional biodi-  
443 versity. Our model demonstrates a range of intuitive yet novel predictions regarding the  
444 implications of dormancy in metacommunity theory as well as the role of spatial pro-  
445 cesses in affecting local seed bank dynamics. Although we have modeled germination,  
446 survival, competition, and dispersal as independent traits, covariance among these traits  
447 could lead to trait syndromes that have implications for metacommunity dynamics and  
448 the maintenance of diversity and present an exciting next direction (Buoro & Carlson,  
449 2014; Rubio de Casas *et al.*, 2015; Wisnoski *et al.*, 2019). Likewise, we follow similar as-  
450 sumptions from other metacommunity studies by assuming that species exhibit similar  
451 dispersal probabilities (Shoemaker & Melbourne, 2016; Thompson *et al.*, 2020). Future  
452 work investigating trade-offs among dispersal and competition, germination, or survival  
453 may reveal favorable strategies that allow species to coexist in a spatio-temporally variable  
454 landscape.

## 455 **Conclusions**

456 Seed bank dormancy has played a key role in empirical studies of diversity and community  
457 turnover, including in restoration settings (Box 1; Saatkamp *et al.*, 2014). Simultaneously, it  
458 is classically invoked as a key mechanism that promotes coexistence through the temporal  
459 storage effect (Warner & Chesson, 1985; Adler *et al.*, 2006; Angert *et al.*, 2009). Yet, despite  
460 this history, its incorporation into metacommunity models has lagged, making it difficult  
461 to predict how dispersal and dormancy will alter diversity at local and regional scales.  
462 Here, we demonstrate that seed survival and germination interact with dispersal to affect  
463 diversity across spatial scales. For example, the combination of high dispersal and low  
464 germination can overcome the classic hump-shaped relationship between dispersal and  
465 alpha-diversity predicted in many metacommunity models, but only when seed bank  
466 survival is high and competitive interactions are neutral. When seed bank survival is  
467 low, the seed bank becomes a demographic sink that reduces alpha-diversity. Thus, the  
468 implications of dormant seed banks scale nonlinearly with space to influence regional  
469 patterns of biodiversity. Integrating insights from both empirical and theoretical studies  
470 is likely to be a key step towards understanding the spatial scales at which dormant seed  
471 banks promote or erode diversity in natural systems. In particular, empirical estimates of  
472 survival rates in the seed bank will be especially informative given that theory predicts  
473 survival to be an important regulator of the scale-dependent patterns of biodiversity in  
474 metacommunities.

## 475 **Box 1: Empirical applications of metacommunities with seed** 476 **banks**

477 Beyond strengthening our theoretical understanding of the processes that maintain bio-  
478 diversity across spatial scales, integrating seed banks into metacommunity ecology also  
479 has wide-ranging empirical applications. Applied ecology has been at the forefront in  
480 considering seed bank effects on diversity and community composition. In turn, seed  
481 bank theory has contributed to recent advances in biological control (Rees & Hill, 2001;  
482 Strydom *et al.*, 2017), restoration ecology (Bakker *et al.*, 1996; Kiss *et al.*, 2018; Ma *et al.*, 2019),  
483 agriculture (Buhler *et al.*, 1997; Menalled *et al.*, 2001; Ryan *et al.*, 2010), and invasive species  
484 management (Gioria & Pyšek, 2016; Strydom *et al.*, 2017; Gioria & Pyšek, 2017). Despite  
485 the importance of seed germination and survival in applied contexts, theory for the joint  
486 effects of dormancy and dispersal on cross-scale diversity patterns is less developed, but  
487 presents numerous exciting opportunities for future empirical research.

488 Research on spatially structured seed banks has uncovered a range of patterns and  
489 insights. First, seed banks provide “ecological memory” that moderates the effectiveness  
490 of biological control strategies and restoration at the landscape scale. This occurs because  
491 germination of viable seeds can reestablish populations, especially when coupled with  
492 high dispersal at large spatial scales (Bakker *et al.*, 1996). For example, in the Tibetan  
493 Plateau, subalpine meadows that had been used for farming for 30 years were left aban-  
494 doned, allowing up to 20 years of natural regeneration (Ma *et al.*, 2019). Even with 30  
495 years of farming, the persistent seed bank remained nearly unchanged, preserving the  
496 composition of the pre-disturbance subalpine community. As a result of the long-term  
497 persistence of the pre-disturbance community in the seed bank, the aboveground com-  
498 munity exhibited high resilience, allowing for the natural recovery of the community to  
499 the pre-disturbance state after agriculture was abandoned (Ma *et al.*, 2019). However, the

500 seed bank can also preserve a memory of spatial dynamics, such as dispersal limitation  
501 or priority effects due to different colonization histories among restoration sites. This may  
502 manifest as unexplained variation in restoration success, similar to spatial differences in  
503 seed bank dynamics observed in other agricultural systems (e.g., Mahaut *et al.*, 2018). The  
504 long-term “ecological memory” in persistent seed banks, combined with the capacity for  
505 rapid spatial spread via dispersal, suggests that the spatial configuration of aboveground  
506 and belowground diversity may be important for promoting successful restorations, either  
507 via natural regeneration or through the addition of seed mixtures.

508       Second, it is common to find differences in diversity or species composition between the  
509 seed bank and the aboveground community (Hopfensperger, 2007; Vandvik *et al.*, 2016),  
510 which suggests the potential for historical contingencies (depending on disturbance his-  
511 tory, order of germination, or seed bank composition) that could lead to spatial variation  
512 in restoration success or control efficacy. For example, a review of experimental and field  
513 studies of grassland seed banks found that, in ecosystems with a disturbance regime  
514 shaped by frequent disturbance-recolonization dynamics, such as wetlands, persistent  
515 seed banks may be able to promote natural recovery of the aboveground community (Kiss  
516 *et al.*, 2018). However, ecosystems that lack a frequent history of disturbance, or in com-  
517 munities that contain species with transient seed banks, active measures may be needed  
518 for successful restoration, such as direct seed addition (Kiss *et al.*, 2018). In restorations  
519 that suffer from a lack of diversity, alternative strategies may focus on spatial processes.  
520 For example, restored sites may benefit from diversity spillover effects of wind-dispersed  
521 species from nearby remnant patches that maintain high diversity (Sperry *et al.*, 2019).  
522 Sufficiently high rates of spatial dispersal may also be necessary to supplement tempo-  
523 ral seed bank dynamics for the maintenance of some specialist species (Plue & Cousins,  
524 2018). Thus, restoration planners should carefully consider the combined effects of spatial  
525 dispersal and germination from the seed bank, helping to ensure that restored popula-



526 tions are capable of establishing in intended habitats and tracking favorable environments  
527 through both time and space.

528 Third, efforts to curb the spatial spread of invasive species may also need to combat  
529 large seed banks dominated by the invasive. Positive feedbacks that in many cases promote  
530 invasiveness could drastically hinder efforts to eliminate invasives. For example, in the  
531 South African fynbos biome, a biodiversity hotspot, invasion by several Australian *Acacia*  
532 species has threatened the rich native biodiversity and efforts to combat their spread have  
533 been costly. *Acacia's* ability to form large seed banks that facilitate their spread is a major  
534 contributing factor to their successful spread (Richardson & Kluge, 2008). Metacommunity  
535 models that examine the species traits common to invaders may be crucial for predicting  
536 how species spread in a spatial community context and which measures might be effective  
537 for controlling their spread. Empirical investigations into the joint spatial and temporal  
538 processes that promote or hinder invasive spread may be especially important to reduce  
539 the social and economic burdens of invasive species.

## 540 **Acknowledgements**

541 We acknowledge computational support from the Teton Computing Environment (<https://doi.org/10.15786/M2FY47>) at the Advanced Research Computing Center (ARCC) at  
542 the University of Wyoming. This research was supported by the Microbial Ecology  
543 Collaborative with funding from NSF award #EPS-1655726.

## 545 **References**

546 Abrams, P. (1984). Variability in resource consumption rates and the coexistence of com-  
547 peting species. *Theoretical Population Biology*, 25, 106–124.

- 548 Adler, P. B., HilleRisLambers, J., Kyriakidis, P. C., Guan, Q. & Levine, J. M. (2006). Climate  
549 variability has a stabilizing effect on the coexistence of prairie grasses. *Proceedings of the*  
550 *National Academy of Sciences*, 103, 12793–12798.
- 551 Adler, P. B., HilleRisLambers, J. & Levine, J. M. (2007). A niche for neutrality. *Ecology*  
552 *Letters*, 10, 95–104.
- 553 Amarasekare, P. (2003). Competitive coexistence in spatially structured environments: A  
554 synthesis. *Ecology Letters*, 6, 1109–1122.
- 555 Andrewartha, H. G. & Birch, L. C. (1954). *The Distribution and Abundance of Animals*. The  
556 University of Chicago Press, Chicago, IL.
- 557 Angert, A. L., Huxman, T. E., Chesson, P. & Venable, D. L. (2009). Functional tradeoffs  
558 determine species coexistence via the storage effect. *Proceedings of the National Academy*  
559 *of Sciences*, 106, 11641–11645.
- 560 Bakker, J. P., Poschlod, P., Strykstra, R. J., Bekker, R. M. & Thompson, K. (1996). Seed banks  
561 and seed dispersal: Important topics in restoration ecology. *Acta Botanica Neerlandica*,  
562 45, 461–490.
- 563 Beverton, R. J. H. & Holt, S. J. (1957). *On the Dynamics of Exploited Fish Populations*. Springer  
564 Netherlands, Dordrecht, Netherlands. ISBN 978-94-010-4934-4.
- 565 Bonis, A. & Lepart, J. (1994). Vertical structure of seed banks and the impact of depth of  
566 burial on recruitment in two temporary marshes. *Vegetatio*, 112, 127–139.
- 567 Brendonck, L. & De Meester, L. (2003). Egg banks in freshwater zooplankton: Evolutionary  
568 and ecological archives in the sediment. *Hydrobiologia*, 491, 65–84.

- 569 Brendonck, L., Pinceel, T. & Ortells, R. (2017). Dormancy and dispersal as mediators of  
570 zooplankton population and community dynamics along a hydrological disturbance  
571 gradient in inland temporary pools. *Hydrobiologia*, 796, 201–222.
- 572 Brown, J. S. & Venable, D. L. (1986). Evolutionary ecology of seed-bank annuals in  
573 temporally varying environments. *The American Naturalist*, 127, 31–47.
- 574 Buhler, D. D., Hartzler, R. G. & Forcella, F. (1997). Implications of weed seedbank dynamics  
575 to weed management. *Weed Science*, 45, 329–336.
- 576 Buoro, M. & Carlson, S. M. (2014). Life-history syndromes: Integrating dispersal through  
577 space and time. *Ecology Letters*, 17, 756–767.
- 578 Chase, J. M. & Leibold, M. A. (2003). *Ecological Niches: Linking Classical and Contemporary*  
579 *Approaches*. The University of Chicago Press, Chicago, IL. ISBN 978-0-226-10179-8  
580 978-0-226-10180-4.
- 581 Chesson, P. (1994). Multispecies competition in variable environments. *Theoretical Popula-*  
582 *tion Biology*, 45, 227–276.
- 583 Chesson, P. (2000a). General theory of competitive coexistence in spatially-varying envi-  
584 ronments. *Theoretical Population Biology*, 58, 211–37.
- 585 Chesson, P. (2000b). Mechanisms of maintenance of species diversity. *Annual Review of*  
586 *Ecology and Systematics*, 31, 343–366.
- 587 Chesson, P. (2018). Updates on mechanisms of maintenance of species diversity. *Journal*  
588 *of Ecology*, 106, 1773–1794.
- 589 Chesson, P. L. & Case, T. J. (1986). Overview: Nonequilibrium community theories:  
590 Chance, variability, history, and coexistence. In: *Community Ecology* (eds. Diamond,  
591 J. M. & Case, T. J.). Harper and Row, pp. 229–239.

- 592 Cleveland, W. S. (1979). Robust locally weighted regression and smoothing scatterplots.  
593 *Journal of the American Statistical Association*, 74, 829–836.
- 594 Cohen, D. (1966). Optimizing reproduction in a randomly varying environment. *Journal*  
595 *of Theoretical Biology*, 12, 119–129.
- 596 Cohen, D. & Levin, S. A. (1987). The interaction between dispersal and dormancy strate-  
597 gies in varying and heterogeneous environments. In: *Mathematical Topics in Population*  
598 *Biology, Morphogenesis and Neurosciences: Proceedings of an International Symposium Held*  
599 *in Kyoto, November 10–15, 1985* (eds. Teramoto, E. & Yumaguti, M.). Springer Berlin  
600 Heidelberg, Berlin, Heidelberg. ISBN 978-3-642-93360-8, pp. 110–122.
- 601 Cohen, D. & Levin, S. A. (1991). Dispersal in patchy environments: The effects of temporal  
602 and spatial structure. *Theoretical Population Biology*, 39, 63–99.
- 603 Cornell, H. V. & Lawton, J. H. (1992). Species interactions, local and regional processes,  
604 and limits to the richness of ecological communities: A theoretical perspective. *Journal*  
605 *of Animal Ecology*, 61, 1–12.
- 606 Gioria, M. & Pyšek, P. (2016). The legacy of plant invasions: Changes in the soil seed bank  
607 of invaded plant communities. *BioScience*, 66, 40–53.
- 608 Gioria, M. & Pyšek, P. (2017). Early bird catches the worm: Germination as a critical step  
609 in plant invasion. *Biological Invasions*, 19, 1055–1080.
- 610 Gremer, J. R. & Venable, D. L. (2014). Bet hedging in desert winter annual plants: Optimal  
611 germination strategies in a variable environment. *Ecology Letters*, 17, 380–387.
- 612 Hallett, L. M., Shoemaker, L. G., White, C. T. & Suding, K. N. (2019). Rainfall variability  
613 maintains grass-forb species coexistence. *Ecology Letters*, 22, 1658–1667.

- 614 Harrison, S. & Cornell, H. (2008). Toward a better understanding of the regional causes  
615 of local community richness. *Ecology Letters*, 11, 969–979.
- 616 Holt, R. D., Holyoak, M. & Leibold, M. A. (2005). Future directions in metacommunity  
617 ecology. In: *Metacommunities: Spatial Dynamics and Ecological Communities* (eds. Holyoak,  
618 M., Leibold, M. A. & Holt, R. D.). The University of Chicago Press, Chicago, IL, pp. 465–  
619 489.
- 620 Holyoak, M., Caspi, T. & Redosh, L. W. (2020). Integrating disturbance, seasonality,  
621 multi-year temporal dynamics, and dormancy into the dynamics and conservation of  
622 metacommunities. *Frontiers in Ecology and Evolution*, 8.
- 623 Holyoak, M., Leibold, M. A. & Holt, R. D., eds. (2005). *Metacommunities: Spatial Dynamics  
624 and Ecological Communities*. The University of Chicago Press, Chicago, IL. ISBN 978-0-  
625 226-35064-9.
- 626 Hopfensperger, K. N. (2007). A review of similarity between seed bank and standing  
627 vegetation across ecosystems. *Oikos*, 116, 1438–1448.
- 628 Horst, J. L. & Venable, D. L. (2018). Frequency-dependent seed predation by rodents on  
629 Sonoran Desert winter annual plants. *Ecology*, 99, 196–203.
- 630 Janzen, D. H. (1971). Seed predation by animals. *Annual Review of Ecology and Systematics*,  
631 2, 465–492.
- 632 Kiss, R., Deák, B., Török, P., Tóthmérész, B. & Valkó, O. (2018). Grassland seed bank and  
633 community resilience in a changing climate. *Restoration Ecology*, 26, S141–S150.
- 634 Kitajima, K. & Tilman, D. (1996). Seed banks and seedling establishment on an experi-  
635 mental productivity gradient. *Oikos*, 76, 381–391.

- 636 Lande, R. (1993). Risks of population extinction from demographic and environmental  
637 stochasticity and random catastrophes. *The American Naturalist*, 142, 911–927.
- 638 Leibold, M. A. & Chase, J. M. (2018). *Metacommunity Ecology*. Princeton University Press,  
639 Princeton, NJ. ISBN 978-0-691-04916-8.
- 640 Leibold, M. A., Holyoak, M., Mouquet, N., Amarasekare, P., Chase, J. M., Hoopes, M. F.,  
641 Holt, R. D., Shurin, J. B., Law, R., Tilman, D., Loreau, M. & Gonzalez, A. (2004). The  
642 metacommunity concept: A framework for multi-scale community ecology. *Ecology*  
643 *Letters*, 7, 601–613.
- 644 Leibold, M. A. & Norberg, J. (2004). Biodiversity in metacommunities: Plankton as  
645 complex adaptive systems? *Limnology and Oceanography*, 49, 1278–1289.
- 646 Levine, J. M. & HilleRisLambers, J. (2009). The importance of niches for the maintenance  
647 of species diversity. *Nature*, 461, 254–7.
- 648 Levine, J. M. & Rees, M. (2004). Effects of temporal variability on rare plant persistence in  
649 annual systems. *The American Naturalist*, 164, 350–363.
- 650 Logue, J. B., Mouquet, N., Peter, H., Hillebrand, H. & The Metacommunity Working  
651 Group (2011). Empirical approaches to metacommunities: A review and comparison  
652 with theory. *Trends in Ecology & Evolution*, 26, 482–491.
- 653 Long, R. L., Gorecki, M. J., Renton, M., Scott, J. K., Colville, L., Goggin, D. E., Commander,  
654 L. E., Westcott, D. A., Cherry, H. & Finch-Savage, W. E. (2015). The ecophysiology of  
655 seed persistence: A mechanistic view of the journey to germination or demise. *Biological*  
656 *Reviews*, 90, 31–59.
- 657 Loreau, M. & Mouquet, N. (1999). Immigration and the maintenance of local species  
658 diversity. *The American Naturalist*, 154, 427–440.

- 659 Ma, M., Baskin, C. C., Li, W., Zhao, Y., Zhao, Y., Zhao, L., Chen, N. & Du, G. (2019).  
660 Seed banks trigger ecological resilience in subalpine meadows abandoned after arable  
661 farming on the Tibetan Plateau. *Ecological Applications*, 29, e01959.
- 662 Mahaut, L., Fried, G. & Gaba, S. (2018). Patch dynamics and temporal dispersal partly  
663 shape annual plant communities in ephemeral habitat patches. *Oikos*, 127, 147–159.
- 664 Menalled, F. D., Gross, K. L. & Hammond, M. (2001). Weed aboveground and seedbank  
665 community responses to agricultural management systems. *Ecological Applications*, 11,  
666 1586–1601.
- 667 Mittelbach, G. G. (2012). *Community Ecology*. Sinauer Associates, Sunderland, MA. ISBN  
668 978-0-87893-509-3.
- 669 Mouquet, N. & Loreau, M. (2003). Community patterns in source-sink metacommunities.  
670 *The American Naturalist*, 162, 544–557.
- 671 Myers, J. A. & Harms, K. E. (2009). Seed arrival, ecological filters, and plant species  
672 richness: A meta-analysis. *Ecology Letters*, 12, 1250–1260.
- 673 Pake, C. E. & Venable, D. L. (1996). Seed banks in desert annuals: Implications for  
674 persistence and coexistence in variable environments. *Ecology*, 77, 1427–1435.
- 675 Plue, J. & Cousins, S. A. O. (2018). Seed dispersal in both space and time is necessary for  
676 plant diversity maintenance in fragmented landscapes. *Oikos*, 127, 780–791.
- 677 Rees, M., Childs, D. Z., Metcalf, J. C., Rose, K. E., Sheppard, A. W. & Grubb, P. J. (2006).  
678 Seed dormancy and delayed flowering in monocarpic plants: Selective interactions in a  
679 stochastic environment. *The American Naturalist*, 168, E53–E71.
- 680 Rees, M. & Hill, R. (2001). Large-scale disturbances, biological control and the dynamics  
681 of gorse populations. *Journal of Applied Ecology*, 38, 364–377.

- 682 Richardson, D. M. & Kluge, R. L. (2008). Seed banks of invasive Australian *Acacia* species  
683 in South Africa: Role in invasiveness and options for management. *Perspectives in Plant*  
684 *Ecology, Evolution and Systematics*, 10, 161–177.
- 685 Ricklefs, R. E. & Schluter, D., eds. (1993). *Species Diversity in Ecological Communities:*  
686 *Historical and Geographical Perspectives*. The University of Chicago Press, Chicago, IL.  
687 ISBN 978-0-226-71822-4 978-0-226-71823-1.
- 688 Rubio de Casas, R., Donohue, K., Venable, D. L. & Cheptou, P.-O. (2015). Gene-flow  
689 through space and time: Dispersal, dormancy and adaptation to changing environ-  
690 ments. *Evolutionary Ecology*, 29, 813–831.
- 691 Ryan, M. R., Smith, R. G., Mirsky, S. B., Mortensen, D. A. & Seidel, R. (2010). Manage-  
692 ment filters and species traits: Weed community assembly in long-term organic and  
693 conventional systems. *Weed Science*, 58, 265–277.
- 694 Saatkamp, A., Poschod, P. & Venable, D. L. (2014). The functional role of soil seed banks  
695 in natural communities. In: *Seeds: The Ecology of Regeneration in Plant Communities* (ed.  
696 Gallagher, R. S.), 3rd edn. CABI, Boston, MA, pp. 263–295.
- 697 Shoemaker, L. G. & Melbourne, B. A. (2016). Linking metacommunity paradigms to spatial  
698 coexistence mechanisms. *Ecology*, 97, 2436–2446.
- 699 Shoemaker, L. G., Sullivan, L. L., Donohue, I., Cabral, J. S., Williams, R. J., Mayfield, M. M.,  
700 Chase, J. M., Chu, C., Harpole, W. S., Huth, A., HilleRisLambers, J., James, A. R. M.,  
701 Kraft, N. J. B., May, F., Muthukrishnan, R., Satterlee, S., Taubert, F., Wang, X., Wiegand,  
702 T., Yang, Q. & Abbott, K. C. (2020). Integrating the underlying structure of stochasticity  
703 into community ecology. *Ecology*, 101, e02922.
- 704 Snyder, R. E. (2006). Multiple risk reduction mechanisms: Can dormancy substitute for  
705 dispersal? *Ecology Letters*, 9, 1106–1114.



- 706 Sperry, K. P., Hilfer, H., Lane, I., Petersen, J., Dixon, P. M. & Sullivan, L. L. (2019). Species  
707 diversity and dispersal traits alter biodiversity spillover in reconstructed grasslands.  
708 *Journal of Applied Ecology*, 56, 2216–2224.
- 709 Strydom, M., Veldtman, R., Ngwenya, M. Z. & Esler, K. J. (2017). Invasive Australian *Acacia*  
710 seed banks: Size and relationship with stem diameter in the presence of gall-forming  
711 biological control agents. *PLOS ONE*, 12, e0181763.
- 712 Thompson, K. (1987). Seeds and seed banks. *New Phytologist*, 106, 23–34.
- 713 Thompson, K. & Grime, J. P. (1979). Seasonal variation in the seed banks of herbaceous  
714 species in ten contrasting habitats. *Journal of Ecology*, 67, 893–921.
- 715 Thompson, P. L., Guzman, L. M., Meester, L. D., Horváth, Z., Ptacnik, R., Vanschoenwinkel,  
716 B., Viana, D. S. & Chase, J. M. (2020). A process-based metacommunity framework  
717 linking local and regional scale community ecology. *Ecology Letters*, 23, 1314–1329.
- 718 Tilman, D. (1982). *Resource Competition and Community Structure*. Princeton University  
719 Press, Princeton, NJ. ISBN 978-0-691-08302-5 978-0-691-08301-8.
- 720 Vandvik, V., Klanderud, K., Meineri, E., Måren, I. E. & Töpper, J. (2016). Seed banks are  
721 biodiversity reservoirs: Species-area relationships above versus below ground. *Oikos*,  
722 125, 218–228.
- 723 Vanschoenwinkel, B., Gielen, S., Seaman, M. & Brendonck, L. (2008). Any way the wind  
724 blows - frequent wind dispersal drives species sorting in ephemeral aquatic communi-  
725 ties. *Oikos*, 117, 125–134.
- 726 Vellend, M. (2016). *The Theory of Ecological Communities*. Princeton University Press,  
727 Princeton, NJ. ISBN 978-0-691-16484-7.

- 728 Venable, D. L. & Brown, J. S. (1988). The selective interactions of dispersal, dormancy,  
729 and seed size as adaptations for reducing risk in variable environments. *The American*  
730 *Naturalist*, 131, 360–384.
- 731 Venable, D. L. & Lawlor, L. (1980). Delayed germination and dispersal in desert annuals:  
732 Escape in space and time. *Oecologia*, 46, 272–282.
- 733 Warner, R. R. & Chesson, P. L. (1985). Coexistence mediated by recruitment fluctuations:  
734 A field guide to the storage effect. *The American Naturalist*, 125, 769–787.
- 735 Wickham, H. (2016). *Ggplot2: Elegant Graphics for Data Analysis*. Use R!, 2nd edn. Springer  
736 International Publishing, Cham. ISBN 978-3-319-24275-0 978-3-319-24277-4.
- 737 Wisnoski, N. I., Leibold, M. A. & Lennon, J. T. (2019). Dormancy in metacommunities. *The*  
738 *American Naturalist*, 194, 135–151.
- 739 Wisnoski, N. I., Muscarella, M. E., Larsen, M. L., Peralta, A. L. & Lennon, J. T. (2020).  
740 Metabolic insight into bacterial community assembly across ecosystem boundaries.  
741 *Ecology*, 101, e02968.

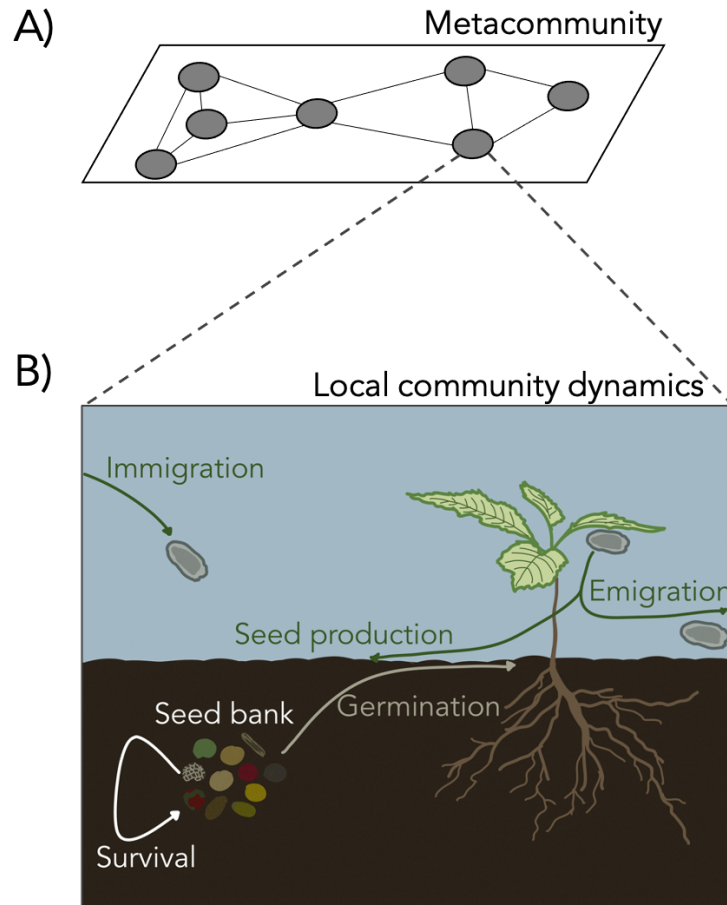

Figure 1: Overview of the metacommunity model. (A) Local communities are uniformly distributed at random across the landscape. In the model, we simulated 100 patches (shown here as gray ovals). For simplicity, lines connecting local communities indicate strong routes of dispersal within the metacommunity (all patches are potentially connected in the model, but nearby patches are more likely to exchange individuals via dispersal). (B) Local community dynamics are governed by aboveground seed production, seed bank survival and seed germination, and immigration and emigration with other patches in the metacommunity, with nearby patches having higher connectivity via dispersal of propagules.

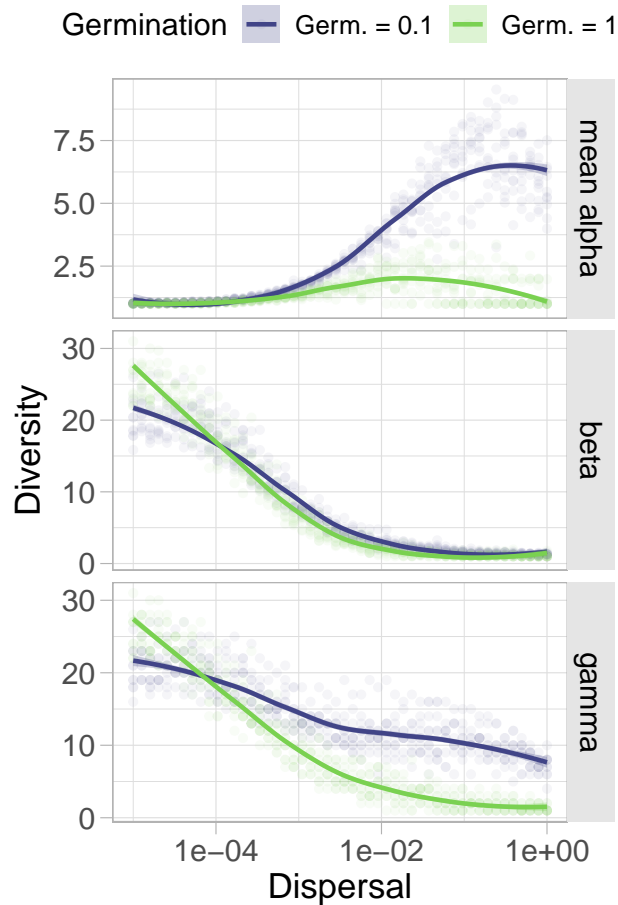

Figure 2: The relationships between mean alpha-, beta-, and gamma-diversity with increasing dispersal are affected by germination rate. Results shown for equal intra- and interspecific competition. Green points and LOWESS fit lines indicate patterns of diversity from traditional metacommunity models (i.e., no dormancy). Blue points and lines indicate patterns that result from the addition of dormancy to metacommunity theory. (Top panel) Reduced germination can shift the expected unimodal relationship between mean alpha-diversity towards the right (so that alpha-diversity peaks at higher dispersal rates) and upwards (so that more diversity overall is maintained within a patch) compared to metacommunities without dormancy. (Middle panel) In this scenario, reduced germination has a smaller overall effect on beta-diversity, but low germination rates can reduce beta-diversity at lower dispersal rates and maintain slightly higher beta-diversity at intermediate dispersal rates. (Bottom panel) Through its effects on alpha- and beta-diversity, reduced germination has important implications for maintaining gamma-diversity. At low dispersal rates, reduced germination leads to losses in gamma-diversity, but once dispersal is sufficiently non-limiting ( $d > 10^{-4}$ ) reduced germination can lead to substantially higher gamma-diversity in the metacommunity. For demonstrative purposes, these simulations assumed that survival in the seed bank was high ( $s = 1$ ).

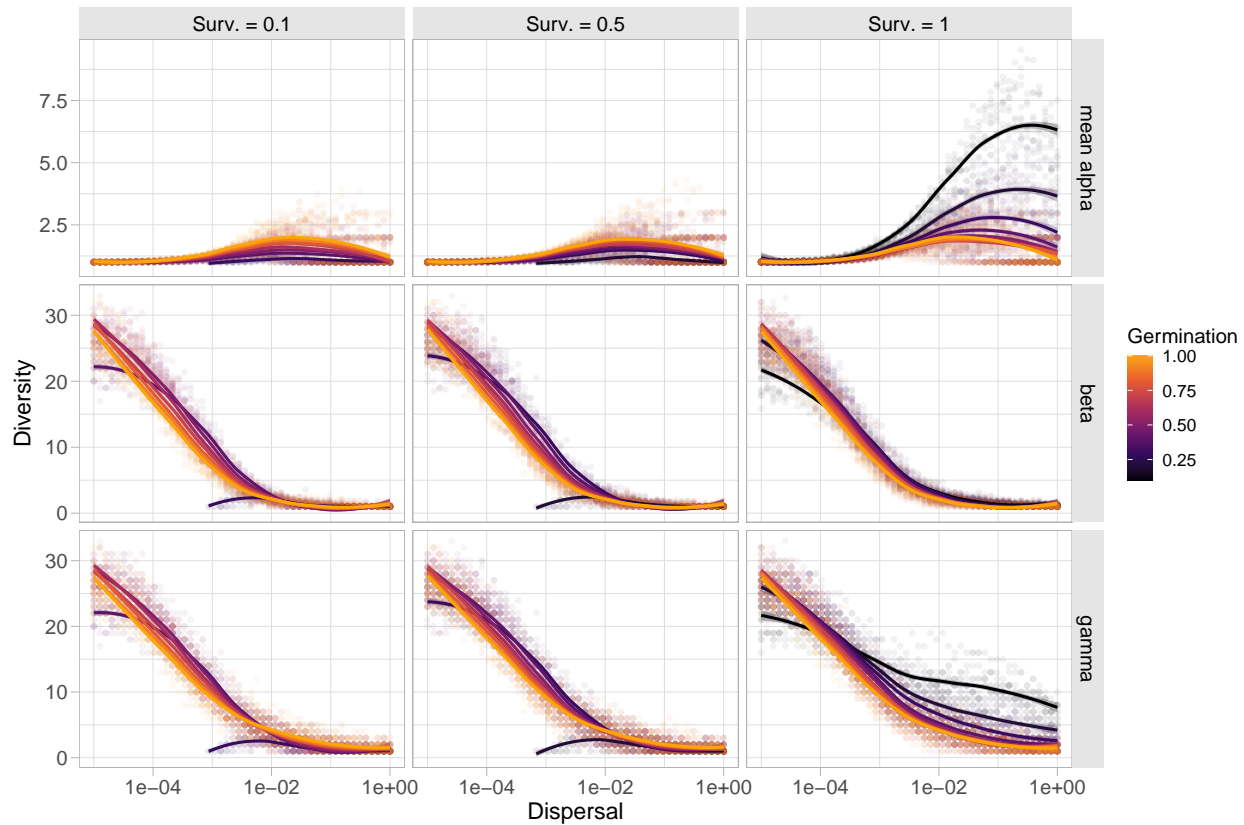

Figure 3: Dispersal-diversity relationships across a range of germination and survival rates with equal competition. In these scenarios, germination plays a key role in shifting the relationships between diversity at different scales and dispersal rate, while survival rate influences the scale-dependent effects of germination and places constraints on the feasible combinations of dispersal and germination that maintain metacommunity diversity. When survival is lower, higher germination rates and higher dispersal rates are necessary to overcome the losses due to reduced survival rates. When survival is high, low germination can reduce gamma-diversity at low dispersal rates, but maintain higher gamma-diversity at higher dispersal rates.

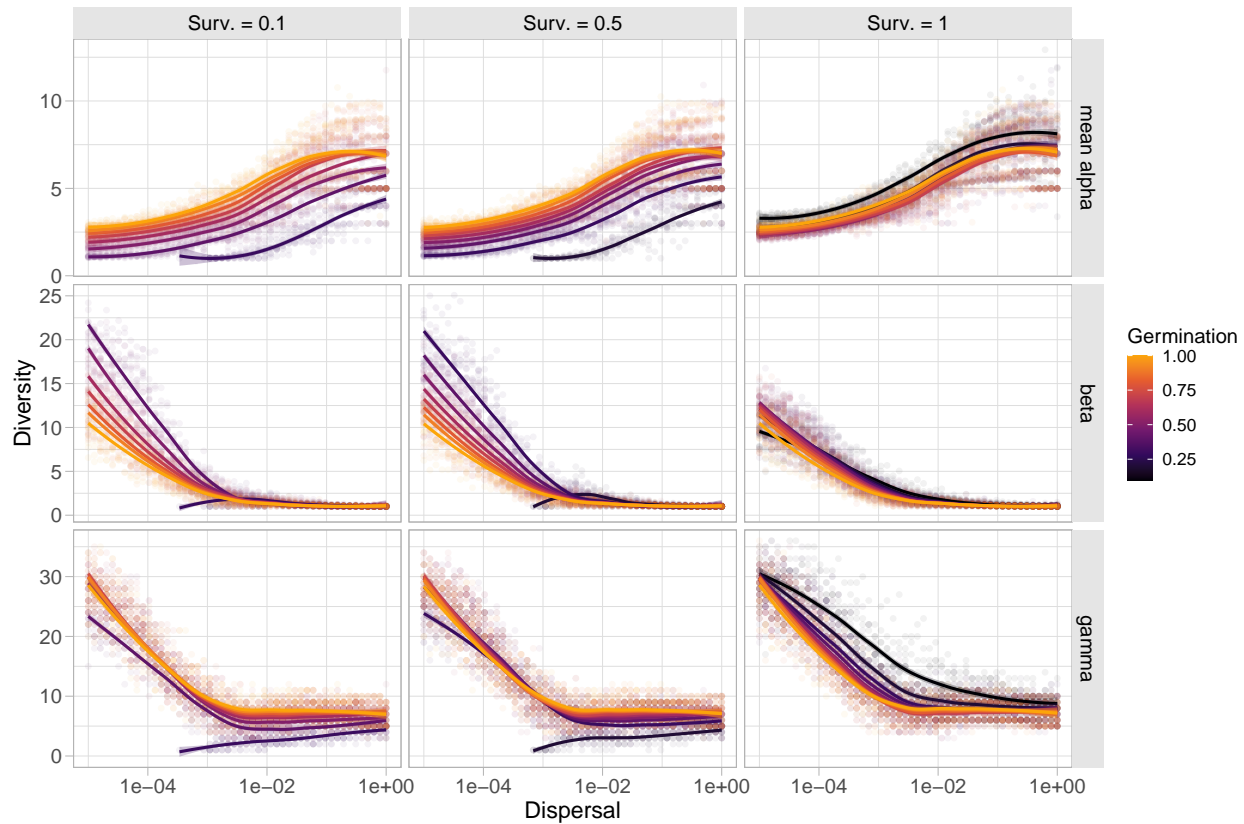

Figure 4: Dispersal-diversity relationships across a range of germination and survival rates with stabilizing competition coefficients. In these scenarios, survival in the seed bank is again a key parameter that regulates the effects of germination at different scales. When survival is low, reduced germination has a negative effect on local diversity by limiting the growth of potentially coexisting species across all dispersal rates, but intermediate germination rates maintain high beta-diversity when dispersal is lower. When survival is high, low germination rates maintain alpha-diversity at all dispersal rates and promote beta-diversity at intermediate dispersal. Consequently, low germination rates maintain high gamma-diversity at all dispersal rates, but especially at low-to-intermediate rates of dispersal.
